# Supplementary material for: Ticagrelor Prevents Endothelial Cell Apoptosis through the Adenosine Signalling Pathway in the Early Stages of Hypoxia
Source: PubMed Central journal article supplement (PMC7277469; doi:10.3390/biom10050740), 2020-05-09
Supplement: biomolecules-10-00740-s001.pdf [file biomolecules-10-00740-s001.pdf]

Supplementary Table 1: List of the primers used in the real time PCR experiments

| Gene | Primer sequence                   |
|------|-----------------------------------|
| EEF2 | Forward: GGCCCTCTTATGATGTATATTTCC |
|      | Reverse: CTGACCTTCAGGCCAGT        |
| A2A  | Forward: TCGCCATTGACCGCTAC        |
|      | Reverse: CCAGCAGATGGCAATGAT       |
| A2B  | Forward: CATCTGTGTCCCGCTCA        |
|      | Reverse: CCACCCAGGAATGGA          |
| A3   | Forward: AGAGCTGATTGTAAGTACG      |
|      | Reverse: GACAACCTTTGGGAGCTT       |

Supplementary data

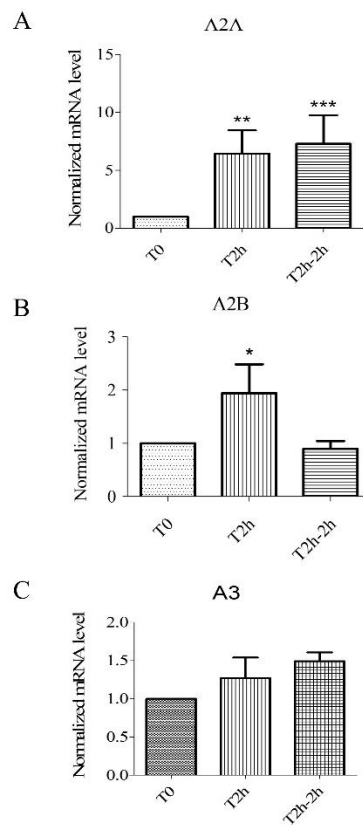

Complement of Figure 1 : mRNA expression after 2 hours of hypoxia and 2 hours of hypoxia followed by 2 hours of reoxygenation for A2A, A2B and A3 receptors.

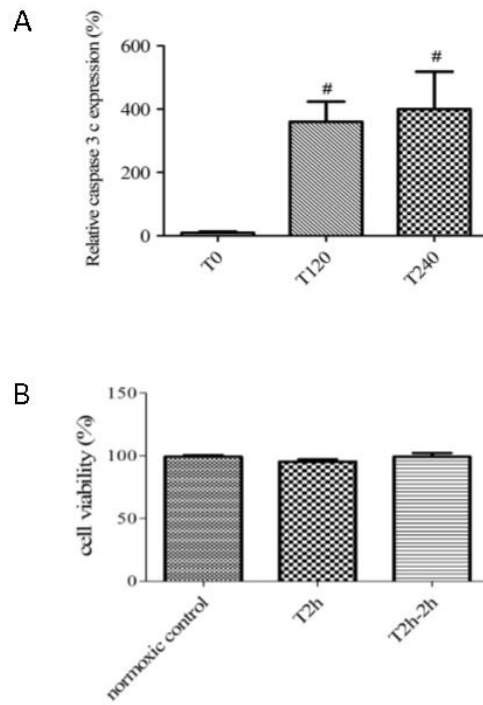

Complement of Figure 2 : Apoptosis and cell viability after 2 hours of hypoxia (T2h) followed by 2 hours of reoxygenation (T2h-2h), determined by the relative expression of cleaved caspase 3 by immunoblotting (A) and PrestoBlue assays (B). Results are expressed as means  $\pm$  sem (n = 6/group). #: p < 0.05, compared to normoxic control.

Extracellular ATP concentrations estimated using LC-HRMS assay.

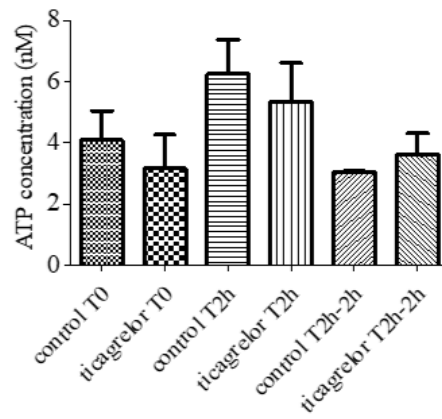

Anova  $p > 0.1$  for difference between groups

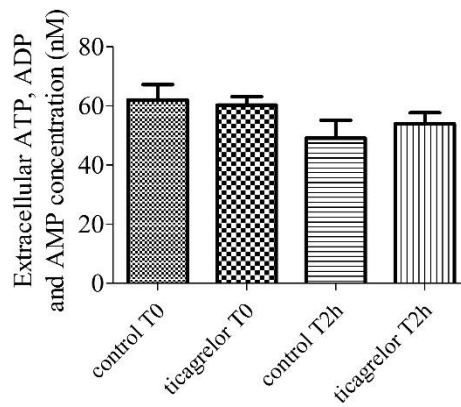

Anova  $p > 0.1$  for difference between groups

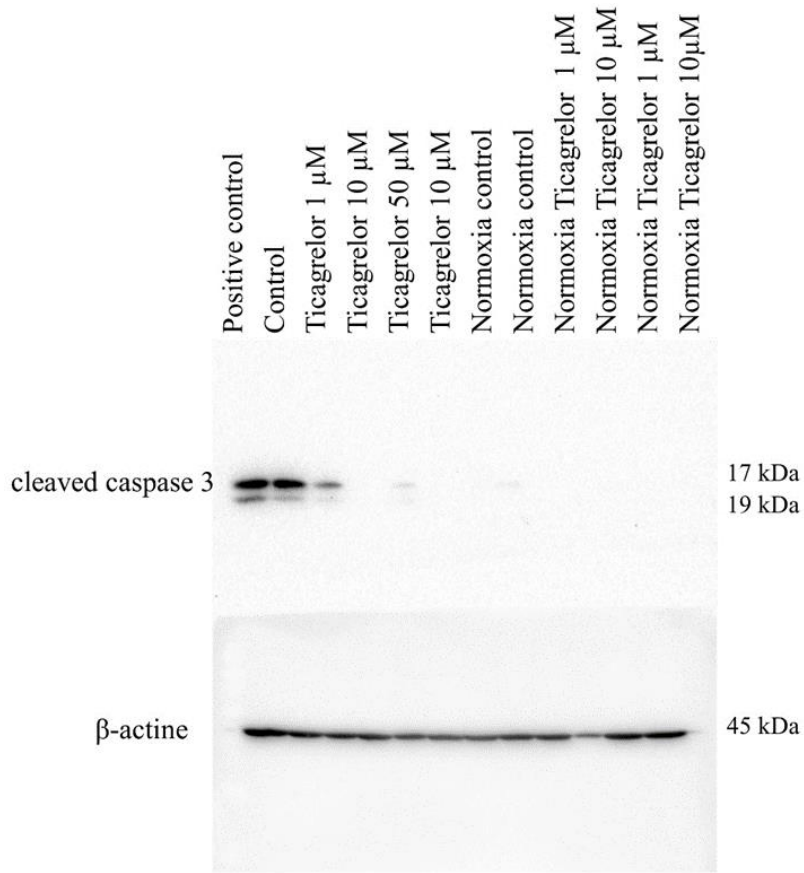

Western blot related to Figure 3

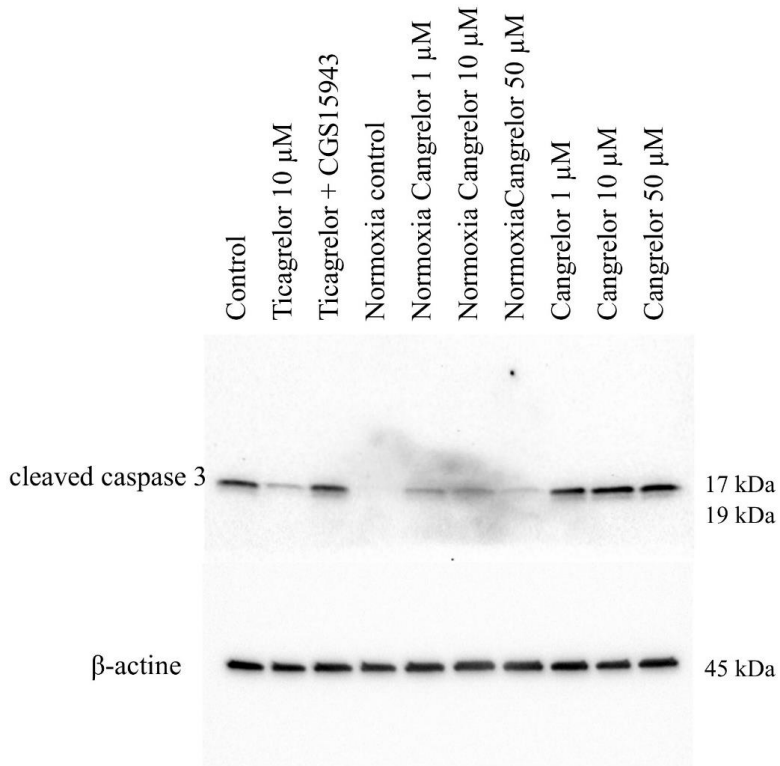

Western blot related to Figure 3

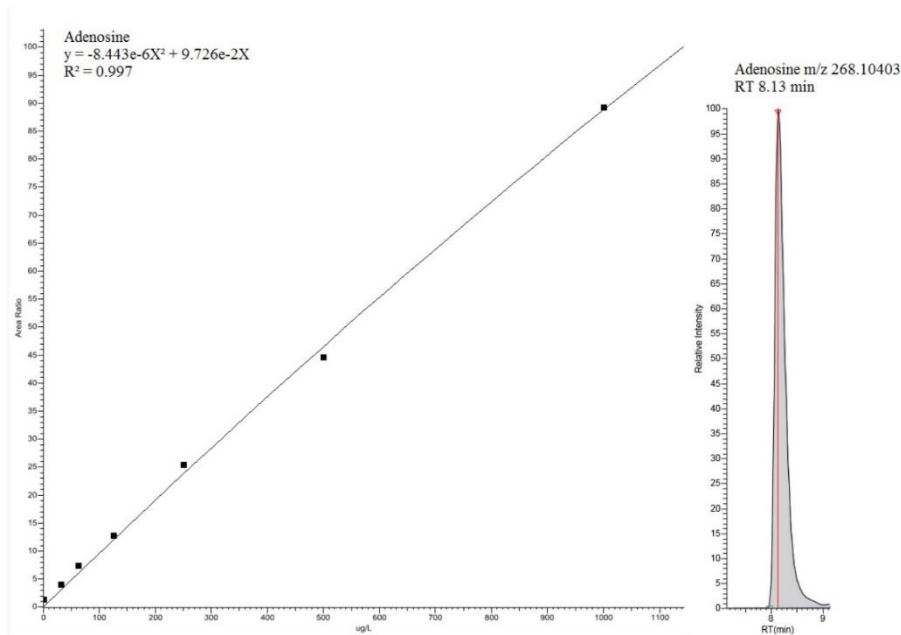

Quantification using liquid chromatography coupled with high resolution mass spectrometry :

Calibration curve of adenosine, coefficient of correlation, retention time, high-resolution masses.

Related to Figure 4

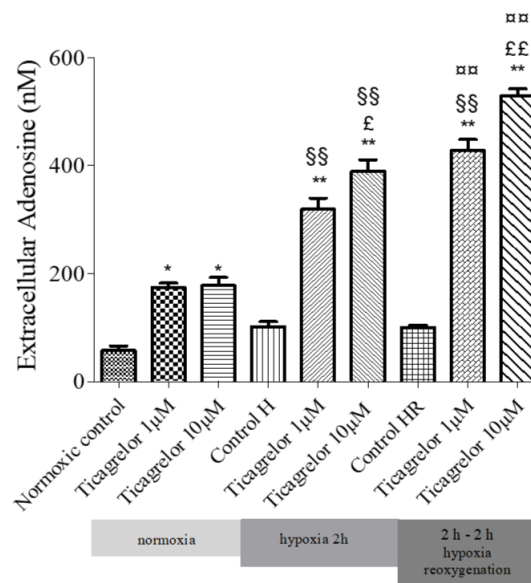

Complement of Figure 4 : Extracellular adenosine concentration: effect of 1 µM and 10 µM ticagrelor during a 2 hours of hypoxia followed by 2 hours of reoxygenation stress in HUVECs. Extracellular adenosine concentrations are expressed in nM. Results are expressed as means ± sem (n = 6/group). \*: p < 0.05, \*\*: p < 0.01, compared to the control groups of the corresponding times; £: p < 0.05, ££: p < 0.01 compared to one µM ticagrelor for each corresponding times. §§: p < 0.01 compared to ticagrelor normoxia for each corresponding concentration. §§§: p < 0.01 compared to ticagrelor hypoxia for each corresponding concentration.

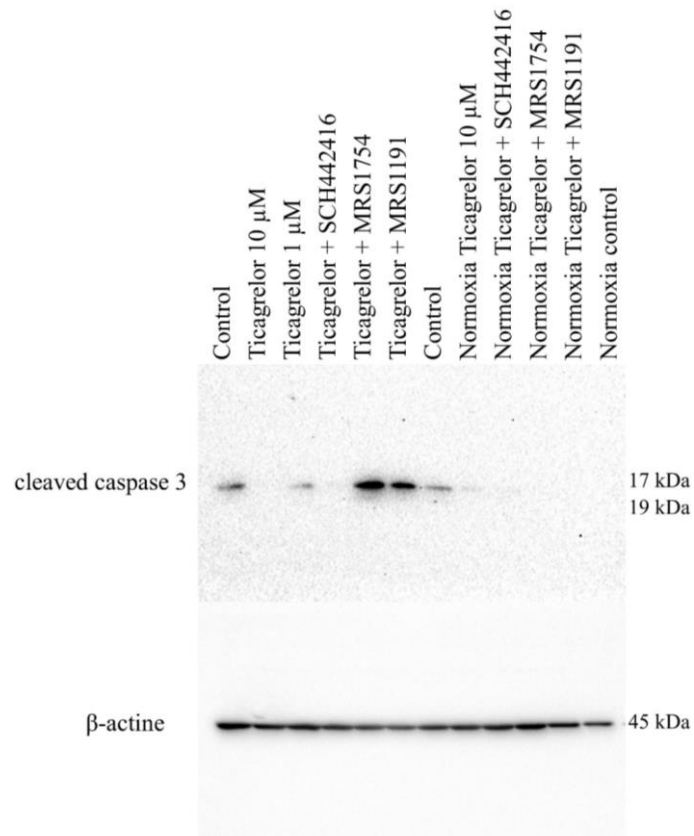

Western blot related to Figure 5

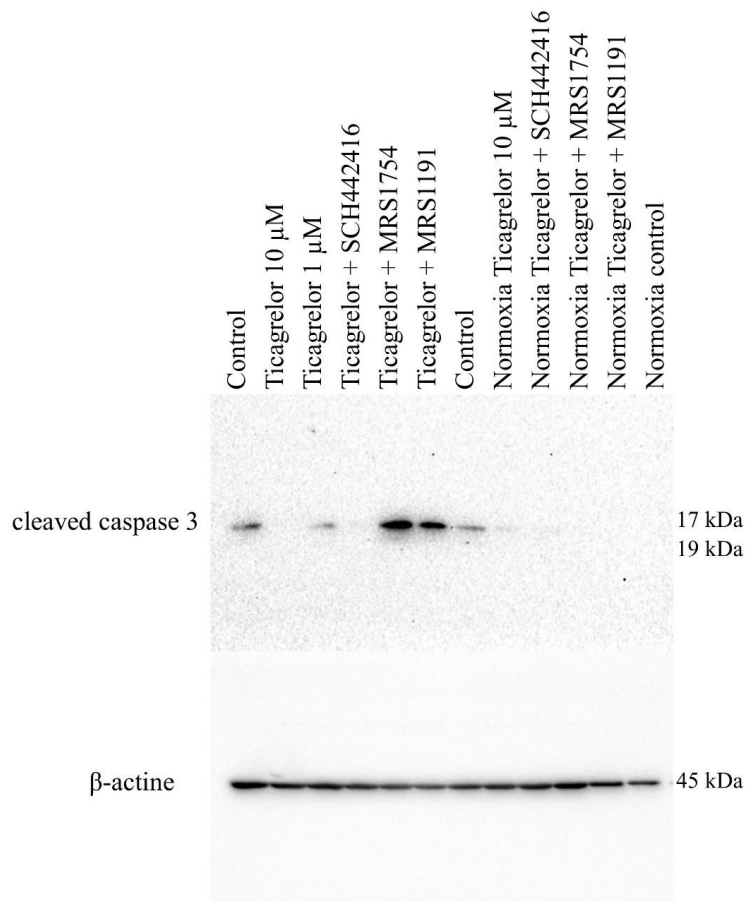

Western blot related to Figure 5
